# Supplementary material for: Indocyanine green clearance test in liver transplantation: defining cut-off levels for graft viability assessment during organ retrieval and for the prediction of post-transplant graft function recovery - the Liver Indocyanine Green (LivInG) Trial Study Protocol
Source: PubMed Central journal article supplement — BMJ Open. 2022 Aug 1;12(8):e063081. doi: 10.1136/bmjopen-2022-063081 (PMC9345038; doi:10.1136/bmjopen-2022-063081), 2022-08-01
Supplement: bmjopen-2022-063081.reviewer_comments.pdf [file bmjopen-2022-063081.reviewer_comments.pdf]

## PEER REVIEW HISTORY

BMJ Open publishes all reviews undertaken for accepted manuscripts. Reviewers are asked to complete a checklist review form (<http://bmjopen.bmj.com/site/about/resources/checklist.pdf>) and are provided with free text boxes to elaborate on their assessment. These free text comments are reproduced below.

## ARTICLE DETAILS

|                            |                                                                                                                                                                                                                                                                        |
|----------------------------|------------------------------------------------------------------------------------------------------------------------------------------------------------------------------------------------------------------------------------------------------------------------|
| <b>TITLE (PROVISIONAL)</b> | Indocyanine Green Clearance Test in Liver Transplantation: Defining Cut-off Levels for Graft Viability Assessment during Organ Retrieval and for the Prediction of Post-transplant Graft Function Recovery. The Liver Indocyanine Green (LivInG) Trial Study Protocol. |
| <b>AUTHORS</b>             | Coppola, Alessandro; GIUSEPPE, BIANCO; Lai, Quirino; Marrone, Giuseppe; Caimano, Miriam; Agnes, Salvatore; Spoletini, Gabriele                                                                                                                                         |

This article was not externally reviewed at BMJ Open. Protocols that have been independently assessed prior to submission to BMJ Open are usually fast-tracked to publication on the grounds that further substantial changes will not be possible. This independent assessment will usually be external, independent review for both a substantial grant award from a non-commercial or government funder and ethics approval.
